# Supplementary material for: A Toxicological Evaluation of Mango Leaf Extract (Mangifera indica) Containing 60% Mangiferin
Source: J Toxicol. 2019 Aug 1;2019:4763015. doi: 10.1155/2019/4763015 (PMC6699309; doi:10.1155/2019/4763015)
Supplement: Supplementary Materials — Supplementary Table 1: summary of mean body weights in the 90-day study on mango leaf extract (60% mangiferin). Supplementary Table 2: summary of mean body weight gain for the 90-day study on mango leaf extract (60% mangiferin). Supplementary Table 3: summary of mean food consumption for the 90-day study on mango leaf extract (60% mangiferin). Supplementary Table 4: summary of mean feed efficiency for the 90-day study on mango leaf extract (60% mangiferin). Supplementary Table 5: summary of hematology results for the 90-day study on mango leaf extract (60% mangiferin). Supplementary Table 6: summary of clinical chemistry results for the 90-day study on mango leaf extract (60% mangiferin). Supplementary Table 7: summary of mean absolute organ weights for the 90-day study on mango leaf extract (60% mangiferin). Supplementary Table 8: summary of mean organ weights relative to body weight, 90-day study, mango leaf extract (60% mangiferin). Supplementary Table 9: summary of mean organ and body weight relative to brain weight, 90-day study, mango leaf extract (60% mangiferin). [file 4763015.f1.xlsx]

## Sheet: Sheet1
Supplemental Table 1. Summary of mean body weights in the 90-day study on mango leaf extract (60% mangiferin)
Group		Body weight (g) on days
mg/kg bw/day		0	4	7	11	14	18	21	25	28	35	42	49	56	63	70	77	84	89
n=10
Males
Control	Mean	204.3	235.2	255.3	277.7	294.1	314.4	326.6	343.4	353.6	371.3	391.6	405.9	419.8	432.9	442.1	451.2	459.8	462.9
	SD	6.84836	8.9542	9.76445	14.9	16.967	19.8001	21.8286	21.3968	23.6559	26.1706	26.6633	28.7071	27.9436	30.0165	31.0285	30.6224	30.0178	31.0034
500	Mean	202.3	235.5	253.6	276.6	295.7	315.2	328.9	346.8	356.9	377.6	401.5	415.5	429.5	442.2	451.5	462.6	469.7	476.8
	SD	5.73585	10.5751	13.36	18.7154	23.6786	27.2674	30.4282	32.0998	36.2106	40.0755	44.9055	46.3879	52.5595	53.9461	54.9672	57.6025	57.8543	58.0724
1000	Mean	202.7	232.4	250	267.9	282.9	302.1	313.8	329.6	337.9	357.3	374.8	389.4	403.3	411.9	420.1	428.2	435.1	441.9
	SD	5.37587	8.42219	11.7284	15.5381	17.7917	19.9691	21.8317	22.4658	24.2828	28.7559	30.897	33.1703	35.3932	35.319	35.679	37.3	37.2811	38.1734
2000	Mean	201.1	235.8	253.6	276	291.4	312.7	324.6	342.1	351.8	371.2	392.2	408	423.8	431.8	443.8	450.6	455.9	462.5
	SD	5.91514	7.25412	11.0875	16.9706	19.7833	24.9491	27.0851	30.9209	32.4476	38.8038	42.4547	45.5412	49.6315	51.387	55.9639	59.787	67.1242	64.9773
test for significance		NS	NS	NS	NS	NS	NS	NS	NS	NS	NS	NS	NS	NS	NS	NS	NS	NS	NS
Females
Control	Mean	144.5	159.3	165.8	179.3	185.3	194.1	199.9	210.2	211.5	219	227	234.5	238.2	243.3	245.9	249.4	250.9	256
	SD	5.16935	5.3965	4.56557	5.35516	5.79367	5.5267	5.78216	7.34544	8.14112	9.64941	9.04311	9.81212	9.94205	11.076	11.7799	11.6543	12.2606	11.7473
500	Mean	144.2	159	163.5	177.6	184.5	194.8	199.9	209.1	212.9	218.7	227.1	233.7	239.3	243.2	247.8	251.2	253.8	258
	SD	6.21468	8.45905	9.62924	11.4134	9.13175	11.8771	13.3454	13.1947	13.94	13.2753	14.5637	15.8749	15.9168	17.9493	16.4641	17.9741	18.546	18.9737
1000	Mean	142.4	155.6	165.8	177.3	184.6	194.5	198.9	208	212.5	217.6	227.3	234.5	239.7	244.2	248	252.4	254.3	257.2
	SD	5.08156	7.79173	9.11409	8.88257	7.63326	8.74643	10.2247	10.0111	12.1678	13.0145	13.0983	13.6484	15.2392	15.9986	14.9666	15.342	16.0073	15.3536
2000	Mean	142.8	158.1	164.3	177.6	182.8	194	199	204.4	209	215.5	224.3	231.1	237.5	241.1	243.9	247.7	249.6	253.2
	SD	5.26624	6.65749	8.8198	8.75849	9.48449	10.9443	10.5935	11.0071	11.804	12.8344	13.4002	12.3509	13.6484	15.8847	15.4089	17.1921	16.6079	16.2125
test for significance		NS	NS	NS	NS	NS	NS	NS	NS	NS	NS	NS	NS	NS	NS	NS	NS	NS	NS
abbreviations: n, number of animals per group; NS, not significant; SD, standard deviation.

## Sheet: Sheet2
Supplemental Table 2. Summary of mean body weight gain for the 90-day study on mango leaf extract (60% mangiferin)
Group		Body weight gain (g) between days
mg/kg bw/day		0-4	4-7	7-11	11-14	14-18	18-21	21-25	25-28	28-35	35-42	42-49	49-56	56-63	63-70	70-77	77-84	84-89	0-89
n=10
Males
Control	Mean	30.9	20.1	22.4	16.4	20.3	12.2	16.8	10.2	17.7	20.3	14.3	13.9	13.1	9.2	9.1	8.6	3.1	258.6
	SD	4.5326	2.76687	7.47143	3.80643	3.88873	3.67575	1.81353	3.25918	4.08384	4.32178	4.29599	4.28045	3.17805	4.73286	4.04008	4.62361	3.47851	29.8671
500	Mean	33.2	18.1	23	19.1	19.5	13.7	17.9	10.1	20.7	23.9	14	14	12.7	9.3	11.1	7.1	7.1	274.5
	SD	6.32104	3.54181	6.61648	6.40226	5.94886	4.85455	3.38132	5.56677	5.3135	6.11828	3.94405	7.65942	3.653	3.36815	4.09471	4.5326	3.07137	54.5492
	SS																	*
1000	Mean	29.7	17.6	17.9	15	19.2	11.7	15.8	8.3	19.4	17.5	14.6	13.9	8.6	8.2	8.1	6.9	6.8	239.2
	SD	3.9172	4.16867	5.5267	3.01846	3.01109	3.36815	2.61619	2.94581	6.32807	5.40062	4.5753	4.20185	5.77735	3.25918	3.47851	3.84274	3.52136	35.2477
	SS																	*
2000	Mean	34.7	17.8	22.4	15.4	21.3	11.9	17.5	9.7	19.4	21	15.8	15.8	8	12	6.8	5.3	6.6	261.4
	SD	4.19126	4.61399	7.07421	4.00555	6.23699	3.31495	5.98609	4.32178	9.75477	6.84755	4.84883	5.65292	8.75595	7.46845	6.33859	11.8982	3.59629	62.3702
test for significance		NS	NS	NS	NS	NS	NS	NS	NS	NS	NS	NS	NS	NS	NS	NS	NS	DN	NS
Females
Control	Mean	14.8	6.5	13.5	6	8.8	5.8	10.3	1.3	7.5	8	7.5	3.7	5.1	2.6	3.5	1.5	5.1	111.5
	SD	2.85968	2.91548	2.17307	4.13656	1.93218	3.11983	2.62679	2.62679	4.71993	4.78423	4.30116	2.83039	4.01248	4.06065	3.97911	4.69633	4.25441	11.2867
500	Mean	14.8	4.5	14.1	6.9	10.3	5.1	9.2	3.8	5.8	8.4	6.6	5.6	3.9	4.6	3.4	2.6	4.2	113.8
	SD	3.55278	4.42844	4.40833	4.70106	3.26769	4.4833	2.29976	2.14994	4.93964	3.92145	3.53396	1.57762	5.58669	4.69515	4.83506	4.00555	3.64539	15.4977
1000	Mean	13.2	10.2	11.5	7.3	9.9	4.4	9.1	4.5	5.1	9.7	7.2	5.2	4.5	3.8	4.4	1.9	2.9	114.8
	SD	3.67575	6.33859	2.4608	4.19126	3.92853	5.62139	2.76687	4.24918	4.30633	3.74314	4.61399	3.64539	3.77859	4.54117	2.50333	3.44642	4.8637	15.612
2000	Mean	15.3	6.2	13.3	5.2	11.2	5	5.4	4.6	6.5	8.8	6.8	6.4	3.6	2.8	3.8	1.9	3.6	110.4
	SD	3.77271	5.34997	3.26769	2.25093	3.8239	4.21637	2.22111	4.24788	3.50397	2.69979	2.29976	3.27278	4.64758	4.07704	4.41714	5.17365	2.75681	13.906
	SS							**
test for significance		NS	NS	NS	NS	NS	NS	DN	NS	NS	NS	NS	NS	NS	NS	NS	NS	NS	NS
Abbreviations: DN, Duncan's multiple range test; n, number of animals per group; NS, not significant; SD, standard deviation; SS, statistical significance.
* p < 0.05
** p < 0.01

## Sheet: Sheet3
Supplemental Table 3. Summary of mean food consumption for the 90-day study on mango leaf extract (60% mangiferin)
Group			Daily mean food consumption (g/animal/day)
mg/kg bw/day		Days	0-7	7-14	14-21	21-28	28-35	35-42	42-49	49-56	56-63	63-70	70-77	77-84	84-89
n=10		Weeks	1	2	3	4	5	6	7	8	9	10	11	12	13
Males
Control	Mean		22.6143	24.8143	25.5571	24.9857	24.6571	25.2571	25.8143	24.9286	24.3143	24.0714	23.7	22.8857	23.24
	SD		1.40625	2.36571	2.02753	1.88014	1.87259	2.06779	2.36763	2.02059	1.89378	2.03289	1.91834	1.95737	1.88515
500	Mean		23.1429	25.6714	26.9286	27.0857	27.1429	27.8286	27.3143	26.6143	25.4857	25.0571	25.2	23.6714	23.86
	SD		1.87234	2.2798	2.60668	2.89749	2.97838	3.16357	2.98279	3.14794	2.75055	2.90999	3.02086	2.51621	2.42405
	SS							*
1000	Mean		22.2714	24.1714	24.8143	24.9143	24.8143	25.0429	24.9857	24.9714	23.9714	23.5286	23.1714	21.6857	22.62
	SD		1.76955	2.19027	2.14026	2.01378	2.19982	2.1392	1.81009	1.90928	1.40746	1.59797	1.55882	1.69406	1.59847
2000	Mean		22.9	24.6429	25.4143	25.8	25.5714	26.2429	25.8857	25.7571	24.0286	24.3571	23.3286	22	23.86
	SD		1.07338	1.92283	2.23094	2.54323	3.06098	2.90909	2.61584	2.3705	2.8554	2.66603	2.72392	4.95742	2.73423
test for significance			NS	NS	NS	NS	NS	DN	NS	NS	NS	NS	NS	NS	NS
Females
Control	Mean		15.7	16.7429	17.5	17.3857	17.3571	17.6143	18.4429	17.4429	16.7571	16.5857	16.2	15.1286	16.22
	SD		1.05506	1.09379	1.13739	1.4507	1.30801	1.7249	1.69091	1.2444	1.21788	1.62248	1.46803	1.10749	1.67186
500	Mean		15.1714	16.7429	17.1429	17.3714	17.1571	17.3857	17.7714	17.4143	16.7571	16.6571	16.1714	15.5286	16.4
	SD		1.44561	1.63688	1.51036	1.42889	1.42452	1.67691	1.76023	1.42452	1.80708	1.55066	1.47358	1.14494	1.45144
	SS							*
1000	Mean		15.7714	16.8714	17.4857	17.5286	17.2143	17.9143	18.2571	17.8857	16.9714	16.9857	16.6857	14.9429	16.16
	SD		1.29922	1.07423	1.7421	1.52982	1.23672	1.52856	1.87815	1.69807	1.29152	1.1595	1.37816	1.20317	1.21033
2000	Mean		15.6857	16.5286	16.8429	16.4714	16.9286	17.8571	17.9714	17.8857	16.4571	17.0143	15.8143	14.9714	16.64
	SD		1.22298	0.819407	1.22973	1.28139	1.41942	1.21405	1.21555	1.99977	3.21265	2.70588	2.77096	0.932653	2.51891
test for significance			NS	NS	NS	NS	NS	DN	NS	NS	NS	NS	NS	NS	NS
Abbreviations: DN, Duncan's multiple range test; n, number of animals per group; NS, not significant; SD, standard deviation; SS, statistical significance.
* p < 0.05
** p < 0.01

## Sheet: Sheet4
Supplemental Table 4. Summary of mean feed efficiency for the 90-day study on mango leaf extract (60% mangiferin)
Group			Feed efficiency (g food consumed/g bwg)
mg/kg bw/day		Days	0-7	7-14	14-21	21-28	28-35	35-42	42-49	49-56	56-63	63-70	70-77	77-84	84-89	0-89
		Weeks	1	2	3	4	5	6	7	8	9	10	11	12	13	1-13
Males
Control	Mean		3.115	4.65244	5.62232	6.61212	10.0893	9.09487	13.7259	15.1213	13.5445	23.9454	21.8054	21.6906	32.8586	7.64265
	SD		0.17373	0.872637	0.724007	1.05875	1.73755	2.13018	4.17488	10.0286	2.82923	13.4531	9.56055	14.7415	14.2426	2.71949
	n		10	10	10	10	10	10	10	10	10	10	10	9	8	10
500	Mean		3.23965	4.51802	5.87782	7.27125	9.53277	8.61881	14.4354	16.6015	15.1724	21.483	17.4745	33.631	19.8946	8.54079
	SD		0.557937	1.06048	0.977323	2.30125	1.68	2.25926	3.33998	7.09654	4.50208	8.431	5.17902	21.1238	9.12035	1.08662
	n		10	10	10	10	10	10	10	10	10	10	10	10	10	10
1000	Mean		3.33708	5.38813	5.78211	7.36709	10.107	10.6205	13.0328	13.4492	21.7973	25.3024	23.0345	24.4885	26.4833	9.02175
	SD		0.351405	1.18336	1.07336	1.04097	4.25412	2.49602	4.02647	3.42926	15.1991	15.8837	8.45395	13.1407	28.4733	0.942063
	n		10	10	10	10	10	10	10	10	9	10	10	9	10	10
2000	Mean		3.11418	4.87629	5.62352	7.07259	9.3364	9.82703	12.3872	13.0764	34.5781	25.9387	22.5753	26.4414	31.6679	8.75269
	SD		0.47095	1.3376	1.24392	2.05971	2.99131	4.04753	3.58303	5.36463	39.025	25.9617	13.3032	21.6831	35.8419	1.7735
	n		10	10	10	10	9	10	10	10	9	10	9	9	10	10
test for significance			NS	NS	NS	NS	NS	NS	NS	NS	NS	NS	NS	NS	NS	NS
Females
Control	Mean		5.25658	6.19043	8.87135	11.8769	26.2413	22.5358	26.3617	30.9226	22.2336	59.1417	47.674	51.8	40.7782	13.5133
	SD		0.80318	1.10251	2.16664	4.60313	35.9739	16.5293	20.3772	16.6826	11.7687	48.7828	41.9032	46.3069	35.7101	0.753884
	n		10	10	10	10	9	10	10	8	8	8	9	5	10	10
500	Mean		5.83146	6.01638	10.335	9.73556	34.651	19.8558	37.7929	23.6702	51.6537	43.0419	42.1774	61.0613	25.7944	13.2455
	SD		1.30205	1.7689	9.01011	2.01634	36.8991	13.8255	45.6101	8.42374	44.5635	37.5664	37.8093	44.4599	22.9867	1.39547
	n		10	10	10	10	9	10	10	10	9	9	7	8	9	10
1000	Mean		4.99883	6.57017	10.2271	9.80128	21.9726	22.9112	20.7671	29.6582	34.324	52.6548	27.8995	28.4429	24.6442	13.3399
	SD		1.17604	1.64376	4.48127	2.84308	7.55822	33.2258	12.472	16.4572	33.3929	37.4955	14.9118	14.1297	25.4312	1.59878
	n		10	10	10	10	9	10	9	9	8	9	9	5	6	10
2000	Mean		5.24214	6.46621	8.02031	13.0403	25.6578	15.4564	20.4767	20.83	47.4976	25.7014	28.856	45.8056	30.1601	13.5888
	SD		0.922057	1.27215	2.99326	4.68662	17.0284	4.76831	7.00848	10.4571	42.5041	9.74966	15.7914	32.4709	23.6288	1.58548
	n		10	10	10	10	10	10	10	9	7	6	9	6	9	10
test for significance			NS	NS	NS	NS	NS	NS	NS	NS	NS	NS	NS	NS	NS	NS
abbreviations: bwg, body weight gain; n, numbers of animals per group with non-zero or non-negative results; NS, not significant; SD, standard deviation.
* p < 0.05
** p < 0.01

## Sheet: Sheet5
Supplemental Table 5. Summary of hematology results for the 90-day study on mango leaf extract (60% mangiferin)
Group		WBC	NEU	LYM	MONO	EOS	BASO	RBC	HGB	HCT	MCV	MCH	MCHC	PLT	RET	PT	APTT
mg/kg bw/day		[x109/L]	[%]	[%]	[%]	[%]	[%]	[x1012/L]	[g/L]	[L/L]	[fL]	[pg]	[g/L]	[x109/L]	[%]	[sec]	[sec]
n=10
Males
Control	Mean	7.05	17.65	77.08	3.39	1.59	0.07	9.554	176.7	0.496	51.95	18.5	356.3	890.6	1.649	10.28	12.54
	SD	0.870823	4.56222	5.73833	1.41378	0.338132	0.0483046	0.112862	3.16403	0.00966092	1.15686	0.380058	3.49762	102.026	0.194505	0.261619	1.48788
500	Mean	6.61	19.93	75.11	2.97	1.66	0.09	9.76	176.4	0.5	51.31	18.1	352.9	913.7	1.662	10.25	12.75
	SD	1.45637	7.69517	7.86687	1.08326	0.660303	0.0567646	0.33493	4.69515	0.0105409	1.34697	0.579272	5.3427	139.092	0.313539	0.150923	1.03736
	SS							*
1000	Mean	7.12	16.88	78.12	3.23	1.42	0.08	9.487	175.4	0.497	52.25	18.52	354.4	879.6	1.746	10.54	13.19
	SD	1.18865	1.45892	2.16579	0.916576	0.352136	0.0632456	0.330826	4.40202	0.0163639	1.53061	0.630344	5.25357	95.9493	0.227704	0.450185	1.84237
2000	Mean	6.36	22.78	72.26	2.89	1.78	0.09	9.876	176	0.509	51.59	17.83	345.4	901.3	1.797	10.69	14.7
	SD	0.945398	14.5583	15.5429	0.837257	0.682805	0.0316228	0.361085	5.71548	0.0179196	0.932678	0.336815	4.35125	155.826	0.237255	0.292309	0.966092
	SS											**	**			**	**
test for significance		NS	NS	NS	NS	NS	NS	U	NS	NS	NS	DN	DN	NS	NS	U	DN
Females
Control	Mean	4.08	13.9	81.91	2.17	1.68	0.09	8.993	166.7	0.476	52.96	18.56	350.5	810.5	2.116	10	14.13
	SD	0.865127	1.81598	1.79348	1.0812	0.549343	0.0737865	0.525612	5.9264	0.0183787	1.54647	0.70899	6.31137	90.6854	0.370291	0.249444	1.1086
500	Mean	3.73	21.45	73.84	2.36	2	0.09	8.751	164.3	0.473	54.14	18.79	347	828.1	2.375	10.02	13.8
	SD	1.1265	17.7712	19.2593	1.17681	1.19536	0.0567646	0.416772	4.3729	0.0133749	1.5522	0.585852	5.57773	112.445	0.512255	0.229976	1.06979
1000	Mean	3.74	19.58	75.98	2.25	1.86	0.04	8.767	163.1	0.472	53.91	18.64	345.5	916.4	2.206	10	14.8
	SD	1.25362	10.0029	10.2237	0.860555	1.01675	0.0516398	0.441086	6.67416	0.0204396	2.16767	0.605897	5.16935	174.741	1.04405	0.282843	1.23468
2000	Mean	3.89	16.8	78.21	2.67	1.92	0.08	8.771	163.4	0.466	53.27	18.63	349.5	919.7	2.226	10.03	14.25
	SD	0.783794	6.16153	7.23271	1.07191	1.19238	0.0632456	0.353222	7.6478	0.0206559	1.46973	0.594512	3.40751	158.899	0.337119	0.156702	1.63656
test for significance		NS	NS	NS	NS	NS	NS	NS	NS	NS	NS	NS	NS	NS	NS	NS	NS
abbreviations: APTT, activated partial thromboplastin time; BASO, basophils; DN, Duncan's multiple range test; EOS, eosinophils; HCT, hematocrit; HGB, hemoglobin; LYM, lymphocytes; MCH, mean corpuscular hemoglobin; MCHC, mean corpuscular hemoglobin concentration; MCV, mean corpuscular volume; MONO, monocytes; n, number of animals per group; NEU, neutrophils; PLT, platelets; PT, prothrombin time; …
* p < 0.05
** p <0.01

## Sheet: Sheet6
Supplemental Table 6. Summary of clinical chemistry results for the 90-day study on mango leaf extract (60% mangiferin)
Group		ALT	AST	GGT	ALP	TBIL	CREA	UREA	GLUC	CHOL	Pi	Ca++	Na+	K+	Cl-	ALB	TPROT	A/G
n=10		[U/L]	[U/L]	[U/L]	[U/L]	[µmol/L]	[µmol/L]	[mmol/L]	[mmol/L]	[mmol/L]	[mmol/L]	[mmol/L]	[mmol/L]	[mmol/L]	[mmol/L]	[g/L]	[g/L]
mg/kg bw/day
Males
Control	Mean	35.6	81.6	-	80.4	1.85	27.7	6.46	5.676	2.41	2.012	2.659	143.62	4.605	98.35	44.57	65.46	2.15
	SD	4.85798	9.84547	-	14.3775	0.400694	3.19896	1.18715	0.344841	0.369624	0.141955	0.0887506	1.11235	0.25229	1.00802	1.50115	2.15314	0.190029
500	Mean	35.9	78.9	-	69.2	1.42	26.5	6.15	5.354	2.45	1.905	2.641	143.47	4.512	98.24	45.33	65.8	2.22
	SD	5.08702	7.9645	-	16.7915	0.304777	1.90029	0.629374	0.349482	0.3331	0.165345	0.0591514	0.992248	0.225181	0.716783	0.964999	2.45719	0.209762
	SS					*
1000	Mean	33.2	83.5	-	82	1.46	27.6	6.18	5.297	2.323	1.942	2.625	143.34	4.665	97.88	45.35	65.57	2.25
	SD	4.1042	13.1508	-	16.5126	0.347051	3.13404	0.802496	0.264115	0.403045	0.169168	0.0903389	1.22038	0.165881	1.10735	0.889757	1.78391	0.108012
	SS					*			*
2000	Mean	33.1	81.4	-	74.9	1.27	27.9	6.26	5.293	2.644	2.12	2.654	143.25	4.619	97.8	44.92	66.3	2.13
	SD	3.95671	9.97998	-	12.8534	0.359166	2.079	0.750111	0.465953	0.643743	0.153188	0.060406	1.5465	0.231682	1.52169	1.53464	2.51087	0.319896
	SS					**			*
test for significance		NS	NS	-	NS	DN	NS	NS	DN	NS	NS	NS	NS	NS	NS	NS	NS	NS
Females
Control	Mean	40.2	89	-	33.2	2.09	33.2	5.83	5.326	2.125	1.379	2.614	143.19	4.006	99.98	51.14	71.8	2.55
	SD	9.02835	20.1494	-	14.3666	0.395671	3.29309	0.620125	0.721498	0.349738	0.145789	0.0838252	1.11101	0.160568	1.39587	3.3909	4.93491	0.516935
500	Mean	46.8	109.8	-	37.6	1.69	34.3	6.24	5.071	2.192	1.417	2.601	143.51	4.025	100.32	50.01	68.48	2.71
	SD	17.5043	46.8681	-	10.5325	0.472464	4.71522	0.490351	0.593154	0.3785	0.113534	0.057436	1.62443	0.164131	1.58731	3.00904	4.49167	0.233095
	SS					*
1000	Mean	39.2	91.1	-	31.7	1.47	35.2	6.1	5.049	2.187	1.336	2.585	142.74	4.018	100.21	49.74	68.7	2.65
	SD	12.0074	15.5381	-	9.87758	0.319896	3.11983	0.774597	0.397756	0.599686	0.245773	0.068516	2.52023	0.178873	2.89845	2.27215	2.24747	0.365908
	SS					**
2000	Mean	37.5	98.4	-	36.6	1.46	34.7	6.15	4.888	2.313	1.512	2.635	142.58	3.848	99.03	51.28	70.29	2.75
	SD	8.54075	23.8989	-	10.543	0.327278	2.66875	0.432692	0.559043	0.487421	0.121363	0.0657013	1.46803	0.106333	1.95622	2.50457	3.34911	0.337474
	SS					**								*
test for significance		NS	NS	-	NS	DN	NS	NS	NS	NS	NS	NS	NS	DN	NS	NS	NS	NS
Abbreviations: -, no data as individual data were below the quantification limit; A/G, albumin to globulin ratio; ALB, albumin; ALP, alkaline phosphatase; ALT, alanine transferase; AST, aspartate transaminase; Ca++, calcium; CHOL, cholesterol; Cl-, chloride; CREA, creatine; DN, Duncan's multiple range test; GGT, gamma-glutamyl transferase; GLUC, glucose; K+, potassium; Na+, sodium; n, number of a…
*p <0.05
**p <0.01

## Sheet: Sheet7
Supplemental Table 7. Summary of mean absolute organ weights for the 90-day study on mango leaf extract (60% mangiferin)
Group		Organ weight (g)
mg/kg bw/day		Body	Brain	Liver	Kidneys	Heart	Thymus	Spleen	Testes/ ovaries	Epididymi-des/uterus	Adrenal
n=10		weight									glands
Males
Control	Mean	442.5	2.107	9.943	2.345	1.103	0.366	0.703	3.571	1.458	0.0693
	SD	28.9415	0.0553875	0.906581	0.195917	0.0853815	0.0556177	0.0478539	0.301199	0.133899	0.0151881
500	Mean	456.2	2.155	10.4	2.522	1.13	0.4	0.68	3.812	1.636	0.0743
	SD	54.9278	0.114334	1.34269	0.373268	0.165731	0.0815135	0.0625389	0.208795	0.23042	0.0140558
	SS								*	*
1000	Mean	422.3	2.087	9.584	2.282	0.986	0.363	0.67	3.505	1.458	0.0688
	SD	36.6941	0.0692901	0.951878	0.157113	0.0704273	0.064816	0.0639444	0.247667	0.144668	0.00973881
	SS					**
2000	Mean	442.3	2.094	9.847	2.433	1.069	0.329	0.658	3.928	1.507	0.0694
	SD	61.4565	0.0836926	1.36691	0.237489	0.149179	0.0665749	0.0817585	0.277601	0.150411	0.0107311
	SS								**
test for significance		NS	NS	NS	NS	U	NS	NS	DN	DN	NS
Females
Control	Mean	241.6	1.967	5.949	1.502	0.677	0.288	0.461	0.1023	0.716	0.0801
	SD	12.8944	0.059264	0.443482	0.0943751	0.0356059	0.0640833	0.067897	0.00995601	0.163041	0.00978037
500	Mean	245.5	2.0161	6.052	1.511	0.739	0.3	0.45	0.1096	0.754	0.0811
	SD	18.4346	0.0751657	0.514367	0.110499	0.048637	0.0639444	0.0733333	0.0228775	0.171542	0.0148358
	SS					*
1000	Mean	242.3	1.946	6.03	1.496	0.719	0.327	0.491	0.1094	0.731	0.083
	SD	15.4995	0.0609554	0.433436	0.121308	0.045326	0.0681583	0.0698331	0.0167544	0.167958	0.00891939
2000	Mean	238.5	1.954	6.154	1.49	0.705	0.29	0.482	0.1041	0.697	0.0788
	SD	17.2836	0.108853	0.49022	0.08	0.0581664	0.0498888	0.0449197	0.0172076	0.173849	0.0101083
test for significance		NS	NS	NS	NS	DN	NS	NS	NS	NS	NS
abbreviations: DN, Duncan's multiple range test; NS, not significant; SD, standard deviation; SS, statistical significance; U, Mann-Whitney U-test versus control.
* p < 0.05
** p < 0.01

## Sheet: Sheet8
Supplemental Table 8. Summary of mean organ weights relative to body weight, 90-day study, mango leaf extract (60% mangiferin)
Group		Organ weight relative to body weight (%)
mg/kg bw/day		Brain	Liver	Kidneys	Heart	Thymus	Spleen	Testes/ ovaries	Epididymides/uterus	Adrenal
n=10										glands
Males
Control	Mean	0.477802	2.24579	0.530521	0.249371	0.0827641	0.159275	0.809668	0.329694	0.0157078
	SD	0.0305125	0.124944	0.0378764	0.0128263	0.0122354	0.0121643	0.0830387	0.0258575	0.00342276
500	Mean	0.47753	2.27914	0.554492	0.247179	0.0885091	0.150819	0.846839	0.361624	0.0162423
	SD	0.0533993	0.0883856	0.0682338	0.0123705	0.0180999	0.0203707	0.113294	0.0552346	0.00203596
1000	Mean	0.497118	2.26987	0.541357	0.234289	0.0867498	0.15888	0.836871	0.348012	0.0163287
	SD	0.0412508	0.11752	0.0200728	0.0166841	0.0184963	0.0113814	0.104113	0.0499932	0.00224271
2000	Mean	0.481467	2.23007	0.555591	0.242508	0.0742884	0.149872	0.905454	0.346369	0.0160491
	SD	0.0659681	0.1102	0.0559476	0.0182883	0.0104021	0.0165569	0.153746	0.0558268	0.00369134
test for significance		NS	NS	NS	NS	NS	NS	NS	NS	NS
Females
Control	Mean	0.815727	2.46416	0.621987	0.280928	0.119384	0.190429	0.0424143	0.298436	0.0332269
	SD	0.0400027	0.169666	0.0288714	0.0203657	0.0269401	0.0226739	0.00438343	0.0742023	0.00430588
500	Mean	0.824766	2.46648	0.616867	0.301702	0.122544	0.183273	0.0446507	0.307605	0.0331633
	SD	0.0588924	0.131245	0.0410398	0.0182564	0.0270564	0.0269263	0.00862429	0.0680403	0.00605032
1000	Mean	0.805972	2.48957	0.617972	0.296988	0.135423	0.202318	0.045357	0.303349	0.0342681
	SD	0.0548561	0.105379	0.0405583	0.0123685	0.0293351	0.0228485	0.00802407	0.074618	0.00298582
2000	Mean	0.821684	2.59054	0.627674	0.29709	0.12215	0.202536	0.0438757	0.293529	0.0331761
	SD	0.0544954	0.259709	0.055857	0.0352556	0.0226439	0.0191695	0.00829102	0.0789786	0.00454068
test for significance		NS	NS	NS	NS	NS	NS	NS	NS	NS
abbreviations: n, number of animals in each group; SD, standard deviation.
*p <0.05
*p < 0.01

## Sheet: Sheet9
Supplemental Table 9. Summary of mean organ and body weight relative to brain weight, 90-day study, mango leaf extract (60% mangiferin)
Group		Organ weight and body weight relative to brain weight (%)
mg/kg bw/day		Body	Liver	Kidneys	Heart	Thymus	Spleen	Testes/ ovaries	Epididy-	Adrenal
n=10		weight							mides/uterus	glands
Males
Control	Mean	21004.9	471.85	111.311	52.3454	17.409	33.3628	169.462	69.15	3.28305
	SD	1321.11	40.7026	9.11218	3.77807	2.84743	2.03092	13.478	5.50421	0.685449
500	Mean	21181.3	482.573	116.797	52.4061	18.4798	31.5747	177.431	75.6745	3.43731
	SD	2408.74	56.2273	14.0746	6.86477	3.15544	2.62494	14.6482	7.35848	0.559589
1000	Mean	20237.9	459.741	109.371	47.2898	17.3987	32.1459	168.139	69.9337	3.30081
	SD	1637.91	48.9632	7.06469	3.71134	3.07762	3.3286	13.4537	7.37718	0.477528
2000	Mean	21077.1	469.15	116.244	50.958	15.6507	31.3672	188.01	71.9106	3.31776
	SD	2501.58	53.4188	11.3845	6.09159	2.8148	3.2042	17.3131	5.78254	0.51344
test for significance		NS	NS	NS	NS	NS	NS	NS	NS	NS
Females
Control	Mean	12285.2	302.925	76.3874	34.4544	14.7058	23.4171	5.20706	36.4695	4.06967
	SD	594.125	27.9664	4.72457	2.23831	3.61415	3.23189	0.5459	8.54454	0.453045
500	Mean	12178.8	300.159	74.9682	36.6657	14.8994	22.2745	5.45107	37.5071	4.02746
	SD	844.36	23.1688	5.17424	2.24261	3.30119	3.16389	1.19407	8.92826	0.746262
1000	Mean	12459.8	310.132	76.9084	36.9817	16.8479	25.2158	5.62992	37.659	4.26188
	SD	856.681	24.1324	6.20759	2.63146	3.66319	3.40853	0.902666	9.10627	0.391351
2000	Mean	12219.9	315.397	76.356	36.1616	14.872	24.7226	5.32743	35.5274	4.03977
	SD	837.066	24.7404	3.9775	3.36247	2.59322	2.5156	0.835561	8.11973	0.514178
test for significance		NS	NS	NS	NS	NS	NS	NS	NS	NS
abbreviations: n, number of animals per group; NS, not significant; SD, standard deviation.
